# Supplementary material for: Efficacy of Quantitative Pupillary Light Reflex for Predicting Neurological Outcomes in Patients Treated with Targeted Temperature Management after Cardiac Arrest: A Systematic Review and Meta-Analysis
Source: Medicina (Kaunas). 2022 Jun 15;58(6):804. doi: 10.3390/medicina58060804 (PMC9230846; doi:10.3390/medicina58060804)
Supplement: Supplementary file 1 [file medicina-58-00804-s001.zip › medicina-1757228-supplementary.pdf]

**Table S1.** Comprehensive list presenting the search strategy

## EMBASE

|   |                                                                                                                                                                                                                                                                                                                                                                                                                                                                           |        |
|---|---------------------------------------------------------------------------------------------------------------------------------------------------------------------------------------------------------------------------------------------------------------------------------------------------------------------------------------------------------------------------------------------------------------------------------------------------------------------------|--------|
| 1 | (return of spontaneous circulation or ROSC).ti,ab. or exp heart arrest/ or cardiac arrest*.ti,ab. or cardiovascular arrest*.ti,ab. or heart arrest*.ti,ab. or cardiopulmonary arrest*.ti,ab. or asystol*.ti,ab. or pulseless electrical activity.ti,ab. or exp ventricular fibrillation/ or exp advanced cardiac life support/ or (advanced cardiac life support or ACLS).ti,ab. or exp cardiopulmonary resuscitation/ or CPR.mp. or cardiopulmonary resuscitation.ti,ab. | 225254 |
| 2 | Hypothermia*.ti,ab. or therapeutic hypothermia.mp. or TTM.ti,ab.                                                                                                                                                                                                                                                                                                                                                                                                          | 41852  |
| 3 | 1 and 2                                                                                                                                                                                                                                                                                                                                                                                                                                                                   | 9959   |
| 4 | pupil*.ti,ab. or pupillometry.ti,ab. or pupillometer.ti,ab. or pupillary light reflex. ti,ab.                                                                                                                                                                                                                                                                                                                                                                             | 38656  |
| 5 | 3 and 4                                                                                                                                                                                                                                                                                                                                                                                                                                                                   | 188    |

## MEDLINE

|   |                                                                                                                                                                                                                                                                                                                                                                                                                                                                           |       |
|---|---------------------------------------------------------------------------------------------------------------------------------------------------------------------------------------------------------------------------------------------------------------------------------------------------------------------------------------------------------------------------------------------------------------------------------------------------------------------------|-------|
| 1 | (return of spontaneous circulation or ROSC).ti,ab. or exp heart arrest/ or cardiac arrest*.ti,ab. or cardiovascular arrest*.ti,ab. or heart arrest*.ti,ab. or cardiopulmonary arrest*.ti,ab. or asystol*.ti,ab. or pulseless electrical activity.ti,ab. or exp ventricular fibrillation/ or exp advanced cardiac life support/ or (advanced cardiac life support or ACLS).ti,ab. or exp cardiopulmonary resuscitation/ or CPR.mp. or cardiopulmonary resuscitation.ti,ab. | 98482 |
| 2 | Hypothermia*.ti,ab. or therapeutic hypothermia.mp. or TTM.ti,ab.                                                                                                                                                                                                                                                                                                                                                                                                          | 35423 |
| 3 | 1 and 2                                                                                                                                                                                                                                                                                                                                                                                                                                                                   | 4656  |
| 4 | pupil*.ti,ab. or pupillometry.ti,ab. or pupillometer.ti,ab. or pupillary light reflex. ti,ab.                                                                                                                                                                                                                                                                                                                                                                             | 30702 |
| 5 | 3 and 4                                                                                                                                                                                                                                                                                                                                                                                                                                                                   | 74    |

## Cochrane library

|   |                                                                                                                                                                                                 |       |
|---|-------------------------------------------------------------------------------------------------------------------------------------------------------------------------------------------------|-------|
| 1 | (return of spontaneous circulation or ROSC or cardiac arrest* or cardiovascular arrest* or heart arrest* or cardiopulmonary arrest* or asystol* or pulseless electrical activity or ventricular | 10752 |
|---|-------------------------------------------------------------------------------------------------------------------------------------------------------------------------------------------------|-------|

|   |                                                                                                                                                                             |      |
|---|-----------------------------------------------------------------------------------------------------------------------------------------------------------------------------|------|
|   | fibrillation or advanced cardiac life support or ACLS or cardiopulmonary resuscitation or CPR):ti,ab,kw                                                                     |      |
| 2 | (paramedic cooling or field hypothermia or hypothermia or targeted temperature management or therapeutic hypothermia or hypothermia therapy or whole body cooling):ti,ab,kw | 4009 |
| 3 | #1 and #2                                                                                                                                                                   | 790  |
| 4 | (pupil* or pupillometry or pupillometer or pupillary light reflex):ti,ab,kw                                                                                                 | 3711 |
| 5 | #3 and #4                                                                                                                                                                   | 10   |

Search for other resources

|    |                                                                                                                                    |
|----|------------------------------------------------------------------------------------------------------------------------------------|
| #1 | cardiac arrest or cardiopulmonary resuscitation or CPR or return of spontaneous resuscitation, ROSC, advanced cardiac like support |
| #2 | targeted temperature management or TTM or hypothermia or hypothermia therapy or hypothermia treatment                              |
| #3 | Pupillometry or pupillary reactivity or pupillary light reactivity or pupillary light reflex or pupillary response                 |
| #5 | #1 and #2 and #3                                                                                                                   |

**Table S2.** Characteristics of excluded from meta-analysis

|    | Study              | Reason for exclusion                                                |
|----|--------------------|---------------------------------------------------------------------|
| 1  | Abend 2010         | Irrelevant data (not pupillometry data)                             |
| 2  | Al Thenayan 2008   | Irrelevant data (not pupillometry data)                             |
| 3  | Bisschops 2011     | Irrelevant data (not pupillometry data)                             |
| 4  | Bouwes 2010        | Irrelevant data (not pupillometry data)                             |
| 5  | Bouwes 2012        | Irrelevant data (not pupillometry data)                             |
| 6  | Bouwes 2011        | Irrelevant data (not pupillometry data)                             |
| 7  | Dhakal 2013        | Irrelevant data (not pupillometry data)                             |
| 8  | Dhakal 2014        | Irrelevant data (not pupillometry data)                             |
| 9  | Eid 2011           | Irrelevant data (not pupillometry data)                             |
| 10 | Fugate 2010        | Irrelevant data (not pupillometry data)                             |
| 11 | Greer 2013         | Irrelevant population (cardiac arrest patients without TTM)         |
| 12 | Hamilton 2018      | Case report                                                         |
| 13 | Hansen, 2010       | Irrelevant population (cardiac arrest patients with or without TTM) |
| 14 | Hanumanthu, 2019   | Irrelevant data (not quantitative pupillometry data)                |
| 15 | Hawkes, 2019       | Systematic review                                                   |
| 16 | Henriksen, 2018    | Irrelevant population (cardiac arrest patients with or without TTM) |
| 17 | Horn, 2010         | Irrelevant data (not quantitative pupillometry data)                |
| 18 | Karapetkova, 2016  | Systematic review                                                   |
| 19 | Kim, 2019          | Irrelevant data (not pupillometry data)                             |
| 20 | Kongpolprom, 2016  | Irrelevant data (not pupillometry data)                             |
| 21 | Kongpolprom, 2018  | Irrelevant data (not pupillometry data)                             |
| 22 | Leithner, 2015     | Irrelevant data (not pupillometry data)                             |
| 23 | Maekawa, 2012      | Irrelevant data (not pupillometry data)                             |
| 24 | Maekawa, 2013      | Irrelevant population (cardiac arrest patients without TTM)         |
| 25 | Maia, 2013         | Irrelevant data (not pupillometry data)                             |
| 26 | Matthews, 2015     | Irrelevant data (not pupillometry data)                             |
| 27 | Matthews, 2018     | Irrelevant data (not pupillometry data)                             |
| 28 | Mila, 2016         | Irrelevant data (not pupillometry data)                             |
| 29 | Oddo, 2017         | Irrelevant data (not pupillometry data)                             |
| 30 | Okada, 2012        | Irrelevant data (not pupillometry data)                             |
| 31 | Reynolds, 2015     | Irrelevant population (cardiac arrest patients without TTM)         |
| 32 | Reynolds, 2015     | Irrelevant population (cardiac arrest patients with or without TTM) |
| 33 | Reynolds, 2014     | Irrelevant population (cardiac arrest patients with or without TTM) |
| 34 | Reynolds, 2016     | Editorial                                                           |
| 35 | Riker, 2019        | Irrelevant data (not quantitative data of light reflex)             |
| 36 | Riker, 2018        | Irrelevant data (not quantitative data of light reflex)             |
| 37 | Rittenberger, 2010 | Irrelevant population (cardiac arrest patients without TTM)         |
| 38 | Samaniego, 2011    | Irrelevant data (not pupillometry data)                             |
| 39 | Sarapuddin, 2015   | Irrelevant data (not pupillometry data)                             |
| 40 | Sawyer, 2018       | Irrelevant data (not quantitative data of light reflex)             |
| 41 | Simonis, 2010      | Irrelevant data (not pupillometry data)                             |
| 42 | Storm, 2015        | Irrelevant data (not pupillometry data)                             |
| 43 | Suys, 2013         | Duplicated data (abstract of included study)                        |
| 44 | Thomke, 2013       | Irrelevant data (not pupillometry data)                             |
| 45 | Touma, 2011        | Irrelevant population (cardiac arrest patients with or without TTM) |
| 46 | Zellner, 2010      | Irrelevant data (not pupillometry data)                             |

Abbreviation: TTM = targeted temperature management.

**Table S3.** Baseline characteristics of individuals in the included studies

| Author      | Outcome | N   | OHCA, % | Age, yr    | Male, n (%) | Witnessed CA, n(%) | Initial rhythm, n (%) |               | CPR related time, min |                  |              |               | Severity score      |
|-------------|---------|-----|---------|------------|-------------|--------------------|-----------------------|---------------|-----------------------|------------------|--------------|---------------|---------------------|
|             |         |     |         |            |             |                    | Shockable             | Non-shockable | Time to ROSC          | CPR duration     | No-flow time | Low flow time |                     |
| Suys*       | Good    | 23  | 100     | 60 (34-81) | 34 (68)     | -                  | -                     | 4(17)         | 15 (34-81)            | -                | -            | -             | -                   |
|             | Poor    | 27  |         | 63 (31-88) |             | -                  | -                     | 16(59)        | 25 (5-50)             | -                | -            | -             | -                   |
| Heimburger† | Good    | 27  | 85      | 52 (48-64) | 67(82)      | 27(100)            | 32 (76.2)             | 3(11)         | -                     | 15.0 (10.0-20.0) | 0(0-5)       | 10(5-27)      | SAPS II = 46(40-62) |
|             | Poor    | 55  | 76      | 64 (54-75) |             | 48(87.2)           | 25 (59.5)             | 25(45)        | -                     | 30.0 (20.5-43.8) | 0(0-4)       | 30(15-54)     | SAPS II = 71(60-88) |
| Oddo†       | Good    | 187 | -       | 60 (49-69) | 154 (80)    | -                  | -                     | 36 (19)       | 19(10-29)             | -                | -            | -             | -                   |
|             | Poor    | 269 | -       | 65 (54-74) | 203 (72)    | -                  | -                     | 160 (57)      | 28(16-41)             | -                | -            | -             | -                   |
| Riker†      | All     | 55  | 80      | 57(48-68)  | 36 (65)     | 38(69)             | 28(51)                | --            | 23(14-34)             | -                | -            | -             | -                   |

\* Continuous variables are presented as median (minimum-maximum)

†Continuous variables are presented as mean ± SD or median (interquartile range).

Time to ROSC: time from cardiac arrest to return of spontaneous circulation (min)

Abbreviation: OHCA = out-of-hospital cardiac arrest; CPR = cardiopulmonary resuscitation; TTM = targeted temperature management; SAPS = Simplified Physiology Score II, APACHE II = Acute Physiology and Chronic Health Evaluation II

**Table S4.** Characteristics of targeted temperature management, supportive care in the included studies.

| Authors     | Outcome | TTM protocol               |                    |                       |            | Sedation, analgesia, and neuromuscular blocking agents during TTM |                          |                         |                                          | Supportive care and agent |         |
|-------------|---------|----------------------------|--------------------|-----------------------|------------|-------------------------------------------------------------------|--------------------------|-------------------------|------------------------------------------|---------------------------|---------|
|             |         | Targeted temperature, (°C) | Maintenance (hour) | Rewarming rate (°C/h) | device     | Propofol                                                          | Midazolam                | Fentanyl                | Neuromuscular blocking agents            | Norepinephrine            | ECLS, % |
| Suys*       | Good    |                            |                    |                       | Artic sun® |                                                                   |                          |                         |                                          | 5.1 (0–44) mg/day         | --      |
|             | Poor    | 33.0                       | 24                 | -                     |            |                                                                   | 0.1 mg/kg/h              | 1.5 µg/kg/h             | rocuronium 0.6 mg/kg bolus, if shivering | 6.2 (0–177.7) mg/day      | -       |
| Heimburger† | Good    | 33.0                       | 24                 | 0.65                  | -          | 2mg/kg/h                                                          | -                        | 0.3 µg/kg/h             | cisatracurium 0.18mg/kg/h                | -                         | 4(15)   |
|             | Poor    | 32.5                       |                    |                       |            |                                                                   |                          |                         |                                          |                           | 16(29)  |
| Oddo†       | Good    | 33 - 199(44%)              | 24                 | -                     | -          | 1.7 (1.1–2.4) mg/h                                                | 0.08 (0.04–0.15) mg/kg/h | 0.49 (0.26–1.4) µg/kg/h | -                                        | 4.9 (1–15) mg/kg/min      | -       |
|             | Poor    | 36 – 257(56%)              |                    |                       |            | 1.8 (1.3–3.7) mg/h                                                | 0.11 (0.06–0.37) mg/kg/h | 0.55 (0.14–1.4) µg/kg/h | -                                        | 5.4 (1–15) mg/kg/min      | -       |
| Riker†      | All     | 33.0                       | 24                 | -                     | Artic sun® | 10–30 mcg/kg/min                                                  | -                        | 20–50 mcg/h             | -                                        | -                         | -       |

\* Continuous variables are presented as median (minimum-maximum)

†Continuous variables are presented as mean ± SD or median (interquartile range).

Time to ROSC: time from cardiac arrest to return of spontaneous circulation (min)

Abbreviation: OHCA = out-of-hospital cardiac arrest; CPR = cardiopulmonary resuscitation; TTM = targeted temperature management; SAPS = Simplified Physiology Score II, APACHE II = Acute Physiology and Chronic Health Evaluation II; ECLS = extracorporeal life support

**Table S5.** Funding and conflict of interest of the included studies

| Authors     | Funding                                                                                                                                                                                                                                                                                                 | Conflict of interest                                                                                                                                                | Blinding                  |                                                                                                                                                                                                                           |
|-------------|---------------------------------------------------------------------------------------------------------------------------------------------------------------------------------------------------------------------------------------------------------------------------------------------------------|---------------------------------------------------------------------------------------------------------------------------------------------------------------------|---------------------------|---------------------------------------------------------------------------------------------------------------------------------------------------------------------------------------------------------------------------|
|             |                                                                                                                                                                                                                                                                                                         |                                                                                                                                                                     | Participant and personnel | Outcome assessment                                                                                                                                                                                                        |
| Suys*       | <b>Yes, but no commercial funding.</b><br>This work was supported by grants from the Swiss National Science Foundation (to MO and AOR), the European Critical Care Research Network (to MO), and the Gueules Cassées Foundation (to PB).                                                                | <b>None</b>                                                                                                                                                         | -                         | <b>Blinding was not performed or incomplete</b><br>(Measure of quantitative PLR was conducted by the ICU research nurse)                                                                                                  |
| Heimburger† | -                                                                                                                                                                                                                                                                                                       | <b>None</b>                                                                                                                                                         | -                         | <b>Blinding was not performed or incomplete</b><br>(Measure of quantitative PLR was conducted by one of the authors of the study)                                                                                         |
| Oddo†       | <b>Yes.</b><br><b>The device manufacturer (Neuroptics®, Irvine, CA, USA) supplied equipment and disposables for the study,</b> but it did not provide any financial support for the study and had no role in the study design, data collection, analysis, and interpretation, or writing of the report. | <b>Yes.</b><br><b>Mauro Oddo has received speaker honoraria from Neuroptics®.</b> All the remaining authors declare no conflicts of interest related to this study. | -                         | <b>Adequate blinding of outcome assessors</b><br>(The ICU clinicians/nurses who performed pupillometry tests were not involved in patient care and the outcome assessors were blinded to quantitative pupillometry data.) |
| Riker†      | <b>Yes, but no commercial funding.</b><br>Funded by the Maine Medical Center Research Institute Summer Grant.                                                                                                                                                                                           | <b>None</b>                                                                                                                                                         | -                         | <b>Blinding is not described</b><br>it is unclear its absence is judged to affect the outcome measurement.                                                                                                                |

\* Continuous variables are presented as median (minimum-maximum)

†Continuous variables are presented as mean ± SD or median (interquartile range).

Time to ROSC: time from cardiac arrest to return of spontaneous circulation (min)

Abbreviation: OHCA = out-of-hospital cardiac arrest; CPR = cardiopulmonary resuscitation; TTM = targeted temperature management; SAPS = Simplified Physiology Score II, APACHE II = Acute Physiology and Chronic Health Evaluation II; PLR=pupillary light reflex

**Table S6.** Data abstraction and study quality assessment of included studies

| Suys 2014                                                         |                                                                                                                                                                                                                                                                                                                                                                                                                                                                                                                                                                                                                                                          |                                                                                             |
|-------------------------------------------------------------------|----------------------------------------------------------------------------------------------------------------------------------------------------------------------------------------------------------------------------------------------------------------------------------------------------------------------------------------------------------------------------------------------------------------------------------------------------------------------------------------------------------------------------------------------------------------------------------------------------------------------------------------------------------|---------------------------------------------------------------------------------------------|
| <b>Method</b>                                                     | <b>Type of study:</b> a single-center prospective observational study<br><b>Countries where the study was performed:</b> Switzerland<br><b>Date of trial:</b> June 2012 - June 2013<br><b>Follow-up until:</b> Neurological outcome: 3 months<br><b>Pupillometry measurement time:</b> hospital day 1 and 2                                                                                                                                                                                                                                                                                                                                              |                                                                                             |
| <b>Participants</b><br>(Data are presented as median and ranges)  | <b>Inclusion:</b><br>Comatose patients resuscitated from out of hospital cardiac arrest and treated with targeted temperature management.<br><br><b>Exclusion:</b><br>Cardiac arrest patient not treated with targeted temperature management<br><br><b>The number of participants analyzed:</b><br>Good neurological outcome (GNO): 23<br>Poor neurological outcome (PNO): 27<br><br><b>Age (years)</b> - GNO: 60 (34-81) / PNO: 63 (31-88)<br><b>Sex (male, %)</b> – 34(68) in total study population                                                                                                                                                  |                                                                                             |
| <b>Interventions</b><br>(Data are presented as median and ranges) | <b>Automated pupillometer:</b><br>The NeuroLight Algiscan® (IDMED, Marseille, France)<br><br><b>Targeted temperature management</b><br>Target temperature, °C: 33.0<br>Maintenance (hour): 24<br>Rewarming rate (°C/h): not reported<br>TTM devices: not reported<br><br><b>Sedation, analgesia, and neuromuscular blocking agents during TTM</b><br>Sedation (midazolam, 0.1 mg/kg/h),<br>analgesia (fentanyl, 1.5 lg/kg/h)<br>neuromuscular blocking agents (rocuronium 0.6 mg/kg bolus, if shivering)<br><br><b>Supportive care and agent</b><br>Norepinephrine (mg/day): not reported<br>Extracorporeal life support (%) - GNO: 4(15) / PNO: 16 (29) |                                                                                             |
| <b>Outcomes</b>                                                   | Neurological outcome at 3 months                                                                                                                                                                                                                                                                                                                                                                                                                                                                                                                                                                                                                         |                                                                                             |
| <b>Note</b>                                                       | None                                                                                                                                                                                                                                                                                                                                                                                                                                                                                                                                                                                                                                                     |                                                                                             |
| <b>Quality in Prognosis Studies (QUIPS)</b>                       |                                                                                                                                                                                                                                                                                                                                                                                                                                                                                                                                                                                                                                                          |                                                                                             |
| <b>Bias</b>                                                       | Author' judgment                                                                                                                                                                                                                                                                                                                                                                                                                                                                                                                                                                                                                                         | Support for judgment                                                                        |
| <b>Study participation</b>                                        | Unclear risk                                                                                                                                                                                                                                                                                                                                                                                                                                                                                                                                                                                                                                             | Key characteristics are not adequately described and Only inclusion criteria were described |
| <b>Study Attrition</b>                                            | Low risk                                                                                                                                                                                                                                                                                                                                                                                                                                                                                                                                                                                                                                                 | There were no follow-up losses.                                                             |
| <b>Prognostic Factor Measurement</b>                              | Low risk                                                                                                                                                                                                                                                                                                                                                                                                                                                                                                                                                                                                                                                 | A clear definition is provided                                                              |
| <b>Outcome Measurement</b>                                        | Low risk                                                                                                                                                                                                                                                                                                                                                                                                                                                                                                                                                                                                                                                 | A clear definition of outcome is provided                                                   |
| <b>Study Confounding</b>                                          | Unclear risk                                                                                                                                                                                                                                                                                                                                                                                                                                                                                                                                                                                                                                             | Important potential confounders are not partially accounted for in the analysis             |

|                                                                          |                                                                                                                                                                                                                                                                                                                                                                                                                                                                                                                                                                                                                                                                       |                                                                                                 |
|--------------------------------------------------------------------------|-----------------------------------------------------------------------------------------------------------------------------------------------------------------------------------------------------------------------------------------------------------------------------------------------------------------------------------------------------------------------------------------------------------------------------------------------------------------------------------------------------------------------------------------------------------------------------------------------------------------------------------------------------------------------|-------------------------------------------------------------------------------------------------|
| Statistical Analysis and Reporting                                       | Low risk                                                                                                                                                                                                                                                                                                                                                                                                                                                                                                                                                                                                                                                              | There is sufficient presentation of data to assess the adequacy of the analysis.                |
| Heimburger 2016                                                          |                                                                                                                                                                                                                                                                                                                                                                                                                                                                                                                                                                                                                                                                       |                                                                                                 |
| Method                                                                   | <b>Type of study:</b> a single-center prospective observational study<br><b>Countries where the study was performed:</b> France<br><b>Date of trial:</b> January 2014 - April 2015<br><b>Follow-up until:</b> Neurological outcome: 3 months<br><b>Pupillometry measurement time:</b> hospital day 1 and 2                                                                                                                                                                                                                                                                                                                                                            |                                                                                                 |
| Participants<br>(Data are presented as median and interquartile ranges)  | <b>Inclusion:</b><br>Cardiac arrest patients who were 18 years or older and had ROSC after in-hospital or out-of-hospital cardiac arrest<br><br><b>Exclusion:</b><br>Patients who had a known neurological disorder before cardiac arrest, imminent death within the first 12 h, a known ocular pathology, or opposition to participate in the study from relatives.<br><br><b>The number of participants analyzed:</b><br>Good neurological outcome (GNO): 27<br>Poor neurological outcome (PNO): 55<br><br><b>Age (years) - GNO:</b> 52 (48-64) / PNO: 64 (54-75)<br><b>Sex (male, %) – 67(82)</b> in total study population                                        |                                                                                                 |
| Interventions<br>(Data are presented as median and interquartile ranges) | <b>Automated pupillometer:</b><br>The NeuroLight Algiscan® (IDMED, Marseille, France)<br><b>Targeted temperature management</b><br>Target temperature, °C: 33.0(GNO) / 32.5(PNO)<br>Maintenance (hour): 24 in both<br>Rewarming rate (°C/h): 0.65 in both<br>TTM devices: not reported<br><b>Sedation, analgesia, and neuromuscular blocking agents during TTM</b><br>Sedation (propofol, 2 mg /kg/ h)<br>analgesia (sufentanil,0.3ug /kg/ h)<br>neuromuscular blocking agents (cisatracurium, 0.18 mg/ kg/ h)<br><b>Supportive care and agent</b><br>Norepinephrine (mg/day) - GNO: 5.1 (0–44) / PNO: 6.2 (0–177.7)<br>Extracorporeal life support (%): not reported |                                                                                                 |
| Outcomes                                                                 | Neurological outcome at 3 months                                                                                                                                                                                                                                                                                                                                                                                                                                                                                                                                                                                                                                      |                                                                                                 |
| Note                                                                     | None                                                                                                                                                                                                                                                                                                                                                                                                                                                                                                                                                                                                                                                                  |                                                                                                 |
| Quality in Prognosis Studies (QUIPS)                                     |                                                                                                                                                                                                                                                                                                                                                                                                                                                                                                                                                                                                                                                                       |                                                                                                 |
| Bias                                                                     | Author’ judgment                                                                                                                                                                                                                                                                                                                                                                                                                                                                                                                                                                                                                                                      | Support for judgment                                                                            |
| Study participation                                                      | Low risk                                                                                                                                                                                                                                                                                                                                                                                                                                                                                                                                                                                                                                                              | The source population or population of interest is adequately described for key characteristics |
| Study Attrition                                                          | Low risk                                                                                                                                                                                                                                                                                                                                                                                                                                                                                                                                                                                                                                                              | Reasons for loss to follow-up are provided.                                                     |
| Prognostic Factor Measurement                                            | Low risk                                                                                                                                                                                                                                                                                                                                                                                                                                                                                                                                                                                                                                                              | Appropriate methods of imputation are used for missing 'PF' data.                               |
| Outcome Measurement                                                      | Low risk                                                                                                                                                                                                                                                                                                                                                                                                                                                                                                                                                                                                                                                              | The method and set of outcome measurements are the same for all study participants.             |

|                                                                                 |                                                                                                                                                                                                                                                                                                                                                                                                                                                                                                                                                                                                                                                                                                                                                                                                                                                              |                                                                                  |
|---------------------------------------------------------------------------------|--------------------------------------------------------------------------------------------------------------------------------------------------------------------------------------------------------------------------------------------------------------------------------------------------------------------------------------------------------------------------------------------------------------------------------------------------------------------------------------------------------------------------------------------------------------------------------------------------------------------------------------------------------------------------------------------------------------------------------------------------------------------------------------------------------------------------------------------------------------|----------------------------------------------------------------------------------|
| <b>Study Confounding</b>                                                        | Unclear risk                                                                                                                                                                                                                                                                                                                                                                                                                                                                                                                                                                                                                                                                                                                                                                                                                                                 | Important confounders, including treatments, are not partially measured          |
| <b>Statistical Analysis and Reporting</b>                                       | Low risk                                                                                                                                                                                                                                                                                                                                                                                                                                                                                                                                                                                                                                                                                                                                                                                                                                                     | There is sufficient presentation of data to assess the adequacy of the analysis. |
| <b>Oddo 2018</b>                                                                |                                                                                                                                                                                                                                                                                                                                                                                                                                                                                                                                                                                                                                                                                                                                                                                                                                                              |                                                                                  |
| <b>Method</b>                                                                   | <b>Type of study:</b> a multicenter prospective observational study<br><b>Countries where the study was performed:</b> Switzerland<br><b>Date of trial:</b> January 2015 - March 2017<br><b>Follow-up until:</b> Neurological outcome: 3 months<br><b>Pupillometry measurement time:</b> hospital day 1, 2 and 3                                                                                                                                                                                                                                                                                                                                                                                                                                                                                                                                             |                                                                                  |
| <b>Participants</b><br>(Data are presented as median and interquartile ranges)  | <b>Inclusion:</b><br>Patients were adult subjects (> 18 years) with coma (Glasgow Coma Score $\leq 6$ ) following a cardiac arrest.<br><br><b>Exclusion:</b><br>Not reported<br><br><b>The number of participants analyzed:</b><br>Good neurological outcome (GNO): 187<br>Poor neurological outcome (PNO): 269<br><br><b>Age (years) - GNO:</b> 60 (49-69) / <b>PNO:</b> 65 (54-74)<br><b>Sex (male, %) - GNO:</b> (154,80) / <b>PNO:</b> (203,72)                                                                                                                                                                                                                                                                                                                                                                                                          |                                                                                  |
| <b>Interventions</b><br>(Data are presented as median and interquartile ranges) | <b>Automated pupillometer:</b><br>Npi-200 pupillometer® (Neuroptics)<br><br><b>Targeted temperature management</b><br>Target temperature, °C: 33.0 (199, 44%) / 36.0 (256, 56%)<br>Maintenance (hour): 24<br>Rewarming rate (°C/h): not reported<br>TTM devices: not reported<br><br><b>Sedation, analgesia, and neuromuscular blocking agents during TTM</b><br>Sedation<br>GNO<br>: propofol, 1.7(1.1-2.4) mg / h, midazolam, 0.08(0.04-0.15) mg /kg/ h<br>PNO<br>: propofol, 1.8(1.3-3.7) mg / h, midazolam, 0.11(0.06-0.37) mg /kg/ h<br><br>Analgesia<br>GNO (Fentanyl, 0.49(0.26-1.4) µg/kg/h)<br>PNO (Fentanyl, 0.55(0.14-1.4) µg/kg/h)<br><br>Neuromuscular blocking agents: not reported<br><br><b>Supportive care and agent</b><br>Norepinephrine (mg/kg/min) - GNO: 4.9 (1–15) / PNO: 5.4 (1–15)<br>Extracorporeal life support (%): not reported |                                                                                  |
| <b>Outcomes</b>                                                                 | Neurological outcome at 3 months                                                                                                                                                                                                                                                                                                                                                                                                                                                                                                                                                                                                                                                                                                                                                                                                                             |                                                                                  |
| <b>Note</b>                                                                     | None                                                                                                                                                                                                                                                                                                                                                                                                                                                                                                                                                                                                                                                                                                                                                                                                                                                         |                                                                                  |

| Quality in Prognosis Studies (QUIPS)                                            |                                                                                                                                                                                                                                                                                                                                                                                                                                                                                                                                                                                                                                             |                                                                                                                               |
|---------------------------------------------------------------------------------|---------------------------------------------------------------------------------------------------------------------------------------------------------------------------------------------------------------------------------------------------------------------------------------------------------------------------------------------------------------------------------------------------------------------------------------------------------------------------------------------------------------------------------------------------------------------------------------------------------------------------------------------|-------------------------------------------------------------------------------------------------------------------------------|
| <b>Bias</b>                                                                     | Author' judgment                                                                                                                                                                                                                                                                                                                                                                                                                                                                                                                                                                                                                            | Support for judgment                                                                                                          |
| <b>Study participation</b>                                                      | Low risk                                                                                                                                                                                                                                                                                                                                                                                                                                                                                                                                                                                                                                    | There is adequate participation in the study by eligible individuals                                                          |
| <b>Study Attrition</b>                                                          | Unclear risk                                                                                                                                                                                                                                                                                                                                                                                                                                                                                                                                                                                                                                | Reasons for loss to follow-up are not provided.                                                                               |
| <b>Prognostic Factor Measurement</b>                                            | Low risk                                                                                                                                                                                                                                                                                                                                                                                                                                                                                                                                                                                                                                    | The method and set of measurements of PF are the same for all study participants.                                             |
| <b>Outcome Measurement</b>                                                      | Low risk                                                                                                                                                                                                                                                                                                                                                                                                                                                                                                                                                                                                                                    | A clear definition of outcome is provided, including the duration of follow-up and level and extent of the outcome construct. |
| <b>Study Confounding</b>                                                        | Unclear risk                                                                                                                                                                                                                                                                                                                                                                                                                                                                                                                                                                                                                                | Measurement of important confounders is not partially valid and reliable                                                      |
| <b>Statistical Analysis and Reporting</b>                                       | Low risk                                                                                                                                                                                                                                                                                                                                                                                                                                                                                                                                                                                                                                    | There is sufficient presentation of data to assess the adequacy of the analysis                                               |
| <b>Riker 2019</b>                                                               |                                                                                                                                                                                                                                                                                                                                                                                                                                                                                                                                                                                                                                             |                                                                                                                               |
| <b>Method</b>                                                                   | <b>Type of study:</b> a single-center prospective observational study<br><b>Countries where the study was performed:</b> USA<br><b>Date of trial:</b> June 28, 2016 - July 22, 2017<br><b>Follow-up until:</b> Neurological outcome: at hospital discharge<br><b>Pupillometry measurement time:</b> hospital day 1                                                                                                                                                                                                                                                                                                                          |                                                                                                                               |
| <b>Participants</b><br>(Data are presented as median and interquartile ranges)  | <b>Inclusion:</b><br>Encephalopathic adults surviving an initial cardiac arrest (any location or rhythm) were treated with TTM<br><br><b>Exclusion:</b><br>Not reported<br><br><b>The number of participants analyzed:</b><br>Good neurological outcome (GNO): 16<br>Poor neurological outcome (PNO): 36<br><br><b>Age (years)</b> - 57 (48-64) in total study population<br><b>Sex (male, %)</b> – 36(65) in total study population                                                                                                                                                                                                        |                                                                                                                               |
| <b>Interventions</b><br>(Data are presented as median and interquartile ranges) | <b>Automated pupillometer:</b><br>Npi-200 pupillometer® (Neuroptics)<br><br><b>Targeted temperature management</b><br>Target temperature, °C: 33.0 in both<br>Maintenance (hour): 24 in both<br>Rewarming rate (°C/h): not reported<br>TTM devices: Arctic Sun (Bard Medical, Covington, GA)<br><br><b>Sedation, analgesia, and neuromuscular blocking agents during TTM</b><br>Sedation (propofol, 10–30 mcg/kg/min)<br>analgesia (fentanyl, 20–50 mcg/h)<br>neuromuscular blocking agents: not reported<br><br><b>Supportive care and agent</b><br>Norepinephrine (mg/day): not reported<br>Extracorporeal life support (%): not reported |                                                                                                                               |

|                                      |                                            |                                                                                                                               |
|--------------------------------------|--------------------------------------------|-------------------------------------------------------------------------------------------------------------------------------|
| Outcomes                             | Neurological outcome at hospital discharge |                                                                                                                               |
| Note                                 | None                                       |                                                                                                                               |
| Quality in Prognosis Studies (QUIPS) |                                            |                                                                                                                               |
| Bias                                 | Author' judgment                           | Support for judgment                                                                                                          |
| Study participation                  | Unclear risk                               | The baseline study sample is not adequately described for key characteristics (LIST).                                         |
| Study Attrition                      | Low risk                                   | Participants lost to follow-up are adequately described for key characteristics (LIST).                                       |
| Prognostic Factor Measurement        | Unclear risk                               | The method and setting of measurement are not the same for all study participants.                                            |
| Outcome Measurement                  | Low risk                                   | A clear definition of outcome is provided, including the duration of follow-up and level and extent of the outcome construct. |
| Study Confounding                    | High risk                                  | Important potential confounders are not accounted for in the study design                                                     |
| Statistical Analysis and Reporting   | Low risk                                   | There is sufficient presentation of data to assess the adequacy of the analysis.                                              |

Abbreviations: TTM = target temperature management GNO; PF = prognostic factor.

**Table S7.** Data abstraction and study quality assessment of included studies

| Study           | Outcome, Time point | Cut-off (%) | TP (n) | FP (n) | FN (n) | TN (n) | Sensitivity (%) | Specificity (%) | PPV (%) | NPV (%) | AUC  |
|-----------------|---------------------|-------------|--------|--------|--------|--------|-----------------|-----------------|---------|---------|------|
| Suys 2014       | 3 months            | 13          | 18     | 2      | 9      | 21     | 66.7            | 91.3            | 90      | 70      | 0.79 |
| Heimbürger 2016 | 3 months            | 9           | 35     | 6      | 20     | 21     | 63.6            | 77.8            | 85.3    | 51.2    | 0.76 |
| Riker 2019      | Hospital discharge  | 5           | 16     | 1      | 20     | 15     | 44.4            | 93.7            | 94.1    | 42.8    | 0.75 |

Abbreviations: TP = true positive; FP = false positive; FN = false negative; TN = true negative; PPV = positive predictive value; NPV = negative predictive value; AUC = area under the curve.

**Table S8.** Data abstraction and study quality assessment of included studies

**Author(s):**

**Question:** In the post-cardiac arrest patients treated with TTM, patients with higher %PLR will have better neurological outcomes compared to patients with lower %PLR ?

**Setting:**

**Bibliography:**

| Certainty assessment                                             |                       |              |               |                             |             |                      | № of patients              |                           | Effect                                                             |                   | Certainty | Importance |
|------------------------------------------------------------------|-----------------------|--------------|---------------|-----------------------------|-------------|----------------------|----------------------------|---------------------------|--------------------------------------------------------------------|-------------------|-----------|------------|
| № of studies                                                     | Study design          | Risk of bias | Inconsistency | Indirectness                | Imprecision | Other considerations | patients with higher %P LR | patients with lower %P LR | Relative (95% CI)                                                  | Absolute (95% CI) |           |            |
| Good neurological outcome at 3 months (%PLR measured at 0-24 h)  |                       |              |               |                             |             |                      |                            |                           |                                                                    |                   |           |            |
| 3                                                                | observational studies | not serious  | not serious   | not serious <sup>a, b</sup> | none        | 231                  | 335                        | -                         | SMD <b>0.87</b><br>SD <b>higher</b><br>(0.7 higher to 1.02 higher) | ⊕⊕○○<br>Low       | CRITICAL  |            |
| Good neurological outcome at 3 months (%PLR measured at 24-48 h) |                       |              |               |                             |             |                      |                            |                           |                                                                    |                   |           |            |
| 3                                                                | observational studies | not serious  | not serious   | not serious                 | none        | 187                  | 290                        | -                         | SMD <b>0.86</b><br>SD <b>higher</b><br>(0.4 higher to 1.32 higher) | ⊕⊕○○<br>Low       | CRITICAL  |            |

CI: confidence interval; SMD: standardized mean difference

**Explanations**

a. %PLR: percent constriction of the pupil light reflex

b. TTM: targeted temperature management

**Table S9. Quantitative pupillary parameters of automated pupilometer in the included studies**

| <b>Authors</b> | <b>Assessment time after admission</b> | <b>Pupillometer</b>                                | <b>Pupillary Parameter</b>                                    | <b>The time point of neurological outcome</b> |
|----------------|----------------------------------------|----------------------------------------------------|---------------------------------------------------------------|-----------------------------------------------|
| Suys           | 0-24h and 24-48h                       | NeuroLight Algiscan®<br>(IDMED, Marseille, France) | Quantitative PLR                                              | At 3 months                                   |
| Heimbürger     | 0-24h and 24-48h                       | NeuroLight Algiscan®<br>(IDMED, Marseille, France) | Quantitative PLR<br>Latency duration<br>Constriction velocity | At 3 months                                   |
| Oddo           | 0-24h, 24-48h and 48-72h               | Npi-200 pupillometer®<br>(Neuroptics)              | Quantitative PLR<br>NPi                                       | At 3 months                                   |
| Riker          | 0-24h                                  | Npi-200 pupillometer®<br>(Neuroptics)              | Quantitative PLR<br>NPi                                       | At hospital discharge                         |

Abbreviation: NPi = neurological pupil index; PLR=pupillary light reflex

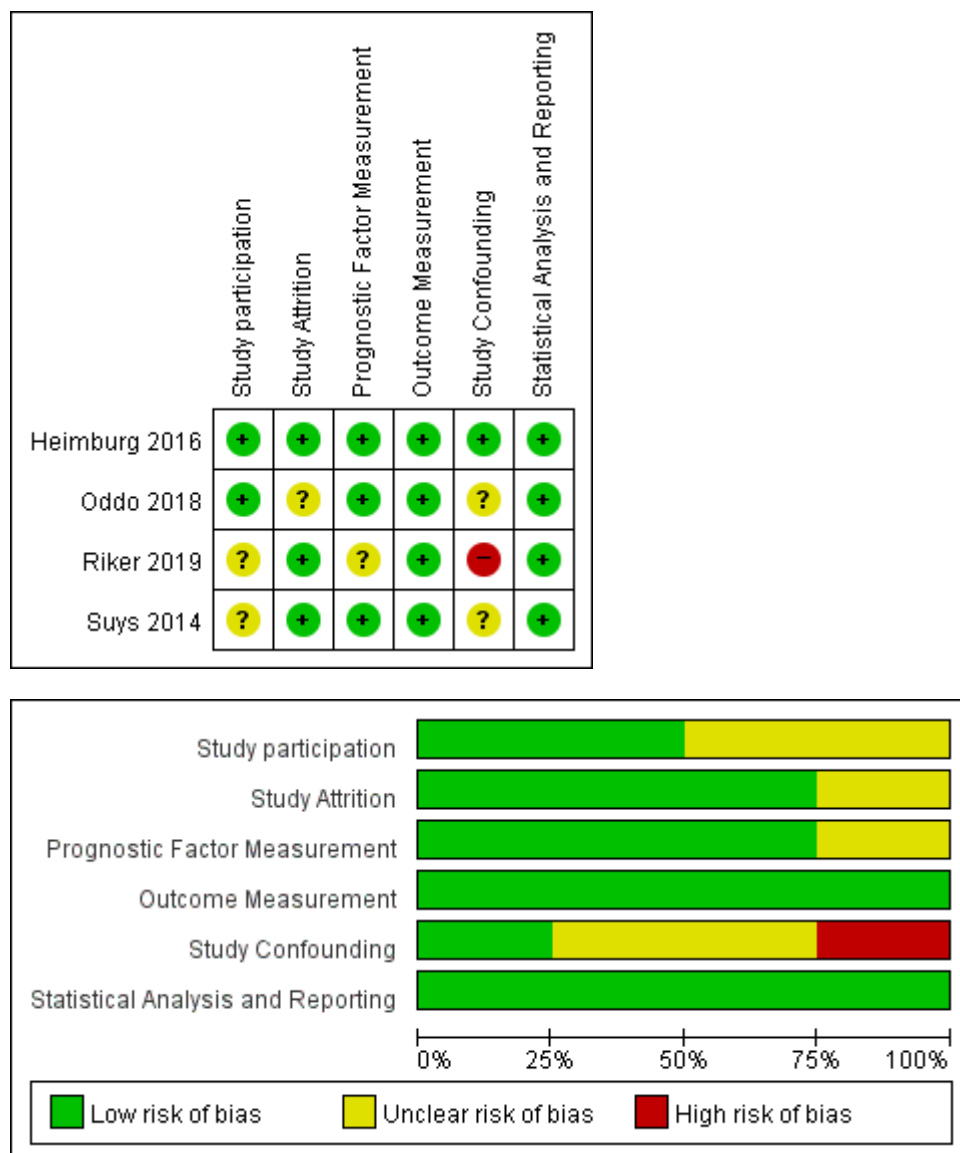

**Figure. S1** Summary of assessment of the risk of bias in the included studies

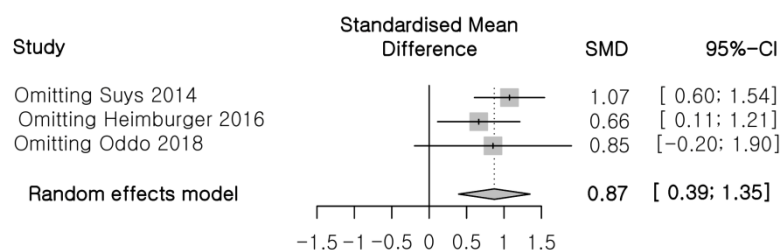

**Figure. S2** the sensitivity analysis of the included studies  
Abbreviations: CI, confidence interval; SD, standard deviation

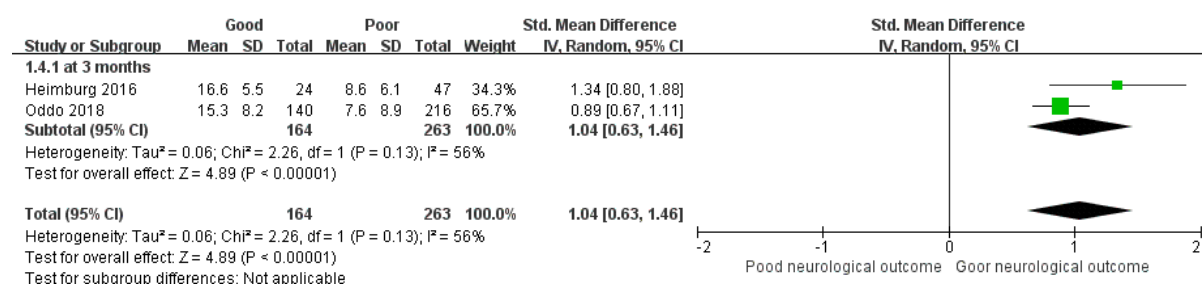

**Figure. S3** Forest plot for percent constriction of pupillary light reflex measured at 24–48 h after hospital admission and neurological outcome at 3 months after the sensitivity analysis of the included studies  
Abbreviations: CI, confidence interval; SD, standard deviation

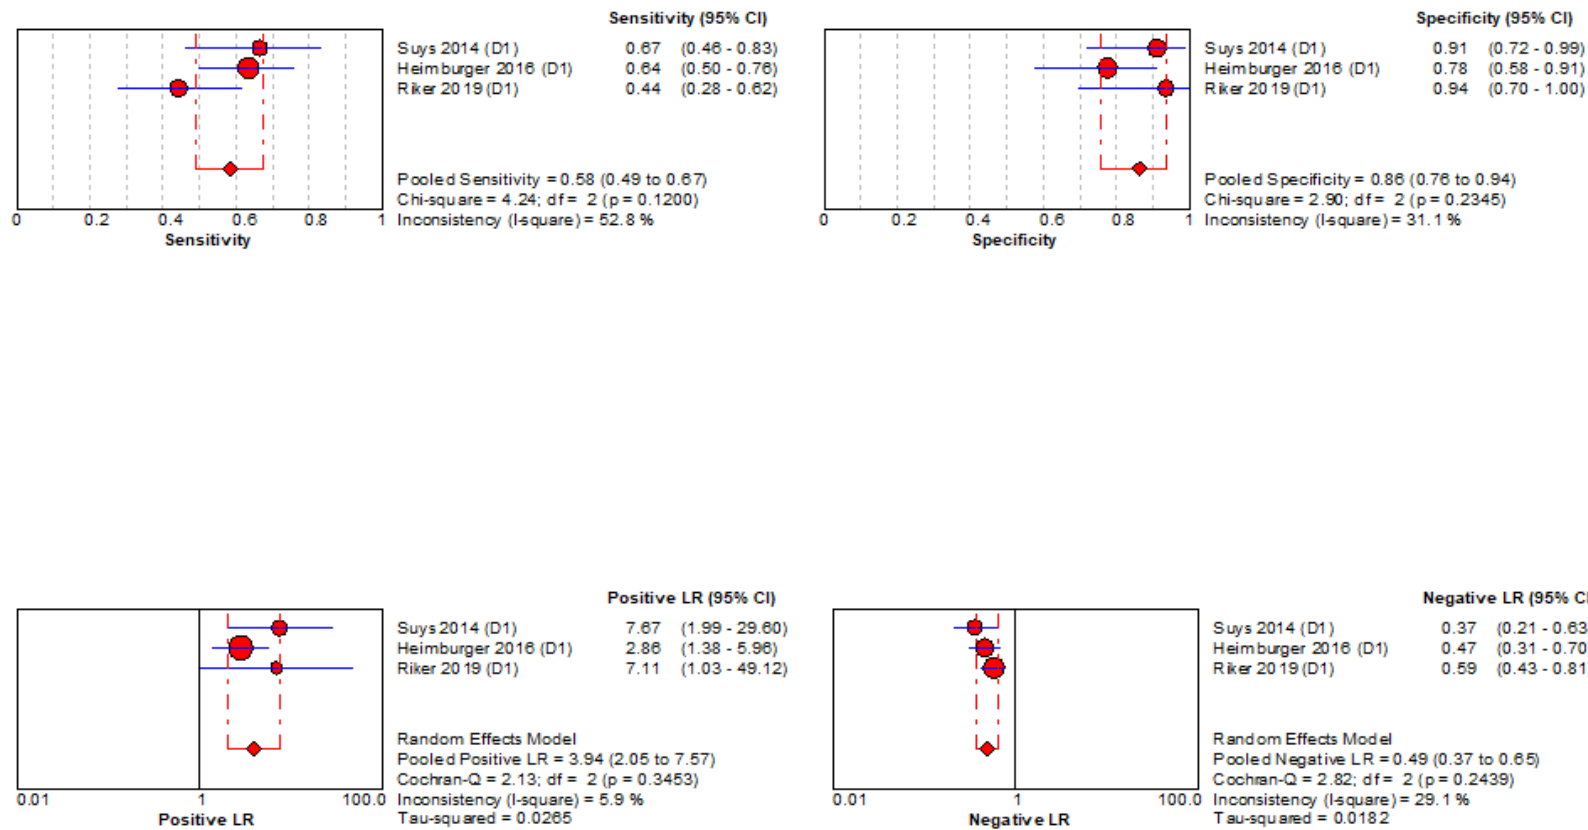

**Figure. S4** Pooled prognostic accuracy of the percent constriction of pupillary light reflex for poor neurological outcome.

A: Pooled sensitivity, B: pooled specificity, C: pooled positive likelihood ratio, D: pooled negative likelihood ratio

Abbreviations: CI, confidence interval; LR, likelihood.
